# Supplementary material
Source: PubMed Central journal article supplement (PMC5065926)
Supplement: NIHMS821337-supplement-supplement_1.pdf [file NIHMS821337-supplement-supplement_1.pdf]

## Supplementary Figure 1

|             | N. | N. donors with 3DL1+ NK cells | %3DL1+ NK cells (median $\pm$ st.dev.) |
|-------------|----|-------------------------------|----------------------------------------|
| 3DL1-C/C    | 20 | 20                            | 17 $\pm$ 9.7                           |
| 3DL1-C/T    | 20 | 20                            | 12 $\pm$ 7.4                           |
| 3DL1-T/T    | 20 | 0                             | n/a                                    |
| 3DL1-C/3DS1 | 20 | 20                            | 13 $\pm$ 10.6                          |
| 3DL1-T/3DS1 | 20 | 0                             | n/a                                    |

Supplementary Figure 1. Perfect correlation between *KIR3DL1* codon 86 typing and percentage of NK cells expressing KIR3DL1.

NK cells from 100 donors, with 20 belonging to each of the five codon 86 genotype groups shown, were analysed by staining with DX9 and Z27 monoclonal antibodies.

## Supplementary Figure 2

|         | FATHER | DONOR 1 | CHILD | DONOR 2 | MOTHER    | CHILD | FATHER | DONOR 3   | CHILD | DONOR 4   | MOTHER    | CHILD     |
|---------|--------|---------|-------|---------|-----------|-------|--------|-----------|-------|-----------|-----------|-----------|
| 2DL1    | 2      | 2       | 2     | 2       | 2         | 2     | 2      | 2         | 2     | 1         | 2         | 2         |
| 2DS1    | 0      | 0       | 0     | 0       | 0         | 0     | 0      | 0         | 0     | 0         | 1         | 1         |
| 2DL2/L3 | 2xL3   | 2xL3    | 2xL3  | 2xL2    | 1xL2/1xL3 | 2xL2  | 2xL3   | 1xL2/1xL3 | 2xL3  | 1xL2/1xL3 | 1xL2/1xL3 | 1xL2/1xL3 |
| 2DL4    | 2      | 3       | 2     | 3       | 2         | 2     | 2      | 3         | 3     | 3         | 2         | 3         |
| 2DL5    | 0      | 0       | 0     | 2       | 1         | 2     | 0      | 1         | 0     | 0         | 2         | 2         |
| 2DP1    | 2      | 2       | 2     | 2       | 2         | 2     | 2      | 2         | 2     | 1         | 2         | 2         |
| 2DS2    | 0      | 0       | 0     | 2       | 1         | 2     | 0      | 1         | 0     | 1         | 1         | 1         |
| 2DS3    | 0      | 0       | 0     | 2       | 1         | 2     | 0      | 1         | 0     | 0         | 2         | 2         |
| 2DS4    | 2      | 2       | 2     | 2       | 2         | 2     | 2      | 2         | 2     | 2         | 1         | 1         |
| 2DS5    | 0      | 0       | 0     | 0       | 0         | 0     | 0      | 0         | 0     | 0         | 0         | 0         |
| 3DL1    | 2      | 2       | 2     | 2       | 2         | 2     | 2      | 2         | 2     | 2         | 1         | 1         |
| 3DL2    | 2      | 2       | 2     | 2       | 2         | 2     | 2      | 2         | 2     | 2         | 2         | 2         |
| 3DL3    | 2      | 2       | 2     | 2       | 2         | 2     | 2      | 2         | 2     | 2         | 2         | 2         |
| 3DP1    | 2      | 3       | 2     | 3       | 2         | 2     | 2      | 3         | 3     | 3         | 2         | 3         |
| 3DS1    | 0      | 1       | 0     | 1       | 0         | 0     | 0      | 1         | 1     | 1         | 1         | 2         |

Supplementary Figure 2. *KIR* gene content obtained using next generation sequencing.

2xL3 indicate two copies of *2DL3*, similarly 2xL2 indicate two copies of *2DL2* and 1xL2/1xL3 indicates heterozygous *2DL2/L3*.

## Supplementary Figure 3

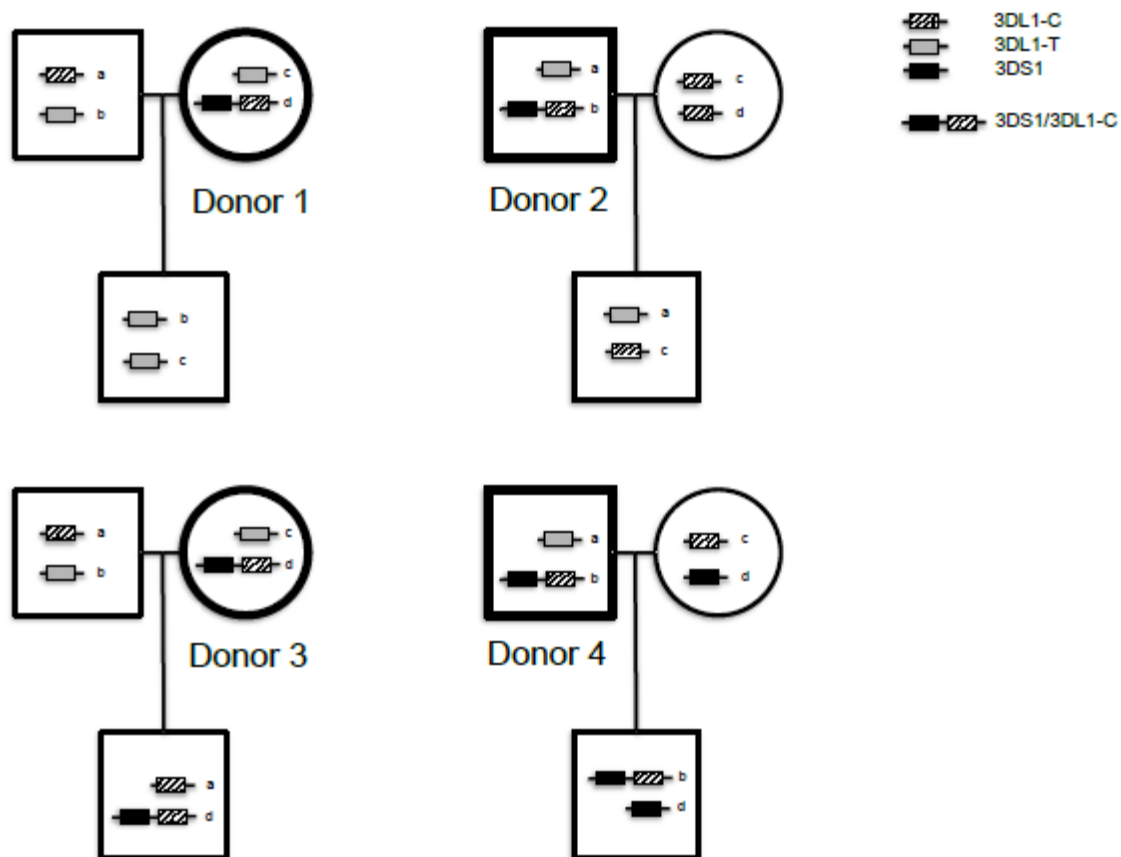

Supplementary Figure 3. Segregation of *3DL1* and *3DS1* alleles in the four trios where the *3DL1/S1* duplication was detected.

Donors carrying the duplication are marked with a bold perimeter.
